# Supplementary material
Source: publisher site journal article supplement (https://www.spandidos-publications.com/6593/downloadSupplementary)

Figure S1. Distribution of the year of publication of the eligible studies.

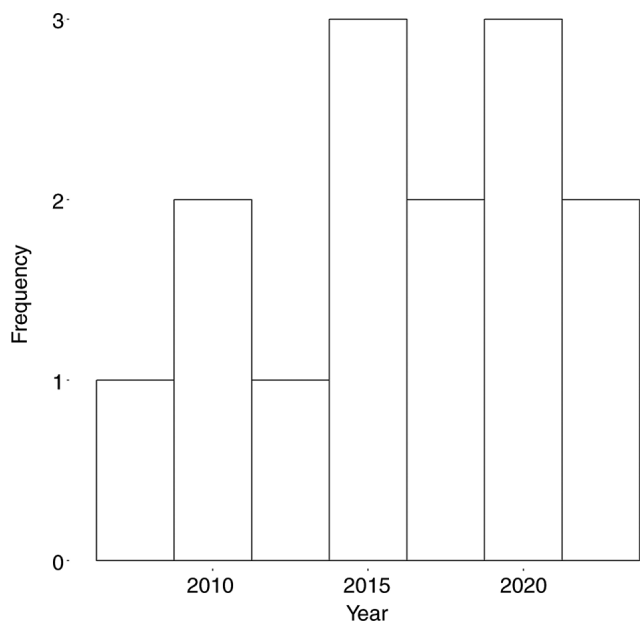

Figure S2. Distribution of countries of the first author in the eligible studies.

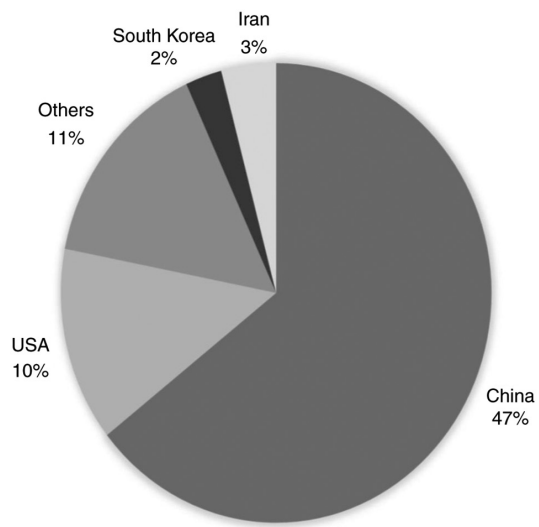

Supplement: Supplementary file 1 [file downloadSupplementary]
